# Supplementary material for: Computational analysis, Urbach energy and Judd–Ofelt parameter of warm Sm3+complexes having applications in photovoltaic and display devices
Source: Royal Society of Chemistry journal article supplement (doi:10.1039/d2ra05796d), 2022-01-01
Supplement: d2ra05796d1.pdf [file d2ra05796d1.pdf]

**Computational analysis, Urbach energy and Judd-Ofelt parameter of warm Sm<sup>3+</sup> complexes possessing application in photovoltaic and display devices**

Poonam Kumari<sup>a</sup>, Vaishnavi Lather<sup>c</sup>, Savita Khatri<sup>a</sup>, Pratibha Ahlawat<sup>a</sup>, Harkesh Sehrawat<sup>a</sup>,  
S. P. Khatkar<sup>b</sup>, V. B. Taxak<sup>b</sup> and Rajesh Kumar<sup>a\*</sup>

<sup>a</sup>University Institute of Engineering and Technology, Maharshi Dayanand University, Rohtak  
- 124001, India

<sup>b</sup>Department of Chemistry, Maharshi Dayanand University, Rohtak - 124001, India

<sup>c</sup>Shri Guru Ram Rai Institute of medical and Health Sciences, Dehradun - 248001, India

\*Corresponding author: Tel.: 9034070027

E-mail address: lather\_rajesh@yahoo.com (Rajesh Kumar)

$$\% \text{ age inhibition} = \frac{A_c - A_t}{A_c} \times 100 \quad (\text{S1})$$

In the aforementioned equation  $A_c$  and  $A_t$  represents the absorbance of control (DPPH radical) and test samples respectively.

$$f^{\text{exp} \leftrightarrow \text{cal}} = \frac{8\pi^2 mc}{3h\lambda(2J+1)n^2} \frac{n(n^2+2)^2}{9} \left[ \begin{aligned} & (\Omega_2 | \langle \psi_J \| U^2 \| \psi \rangle|^2) + (\Omega_4 | \langle \psi_J \| U^4 \| \psi \rangle|^2) \\ & + (\Omega_6 | \langle \psi_J \| U^6 \| \psi \rangle|^2) \end{aligned} \right] \quad (\text{S2})$$

$$A_{\text{rad}} = \frac{64e^2\pi^4}{3h(2J+1)\lambda^3} \frac{n(n^2+2)^2}{9} S_{\text{Ed}} \quad (\text{S3})$$

Hare,  $S_{\text{Ed}}$  is the product of intensity parameter and reduced square matrix element.

$$\alpha = CF(R_\infty) \quad (\text{S4})$$

$$F(R_\infty) = \frac{(1 - R_\infty)^2}{2R_\infty} \quad (\text{S5})$$

In aforementioned equation  $C$  is the constant and  $\alpha$  is the absorption coefficient as Kubelka-Munk's function( $F(R_\infty)$ ).

$$A_{\text{total}} = 1/\tau_{\text{exp}} = (A_{\text{rad}} + A_{\text{nrad}}) \quad (\text{S6})$$

**Table: S1 Molecular parameters of L and C1-C6 complexes.**

| Complexes | Chemical softness ( $\sigma$ ) | Chemical electronegativity ( $\chi$ ), | Chemical Hardness ( $\eta$ ) | Chemical potential ( $\mu$ ) |
|-----------|--------------------------------|----------------------------------------|------------------------------|------------------------------|
| <b>L</b>  | 0.50                           | -0.57                                  | 1.97                         | 0.57                         |
| <b>C1</b> | 0.59                           | -0.53                                  | 1.69                         | 0.53                         |
| <b>C2</b> | 0.61                           | -0.39                                  | 1.63                         | 0.39                         |
| <b>C3</b> | 0.60                           | -0.53                                  | 1.66                         | 0.53                         |
| <b>C4</b> | 0.63                           | -0.14                                  | 1.57                         | 0.14                         |
| <b>C5</b> | 0.61                           | -0.55                                  | 1.62                         | 0.55                         |
| <b>C6</b> | 0.58                           | -0.70                                  | 1.71                         | 0.70                         |

**Table S2. Comparison of Judd Ofelt properties, decay time, color purity, intrinsic quantum yield and relative quantum yield with other similar system given in literature.**

| Complexes                                              | $\Omega_2 \times 10^{-2}$ | $\Omega_4 \times 10$ | $\Omega_6 \times 10^{-2}$ | Trend                            | $\tau_{exp}$ (ms) | CP(%) | $\Phi$ (%) | $\eta$ % |              |
|--------------------------------------------------------|---------------------------|----------------------|---------------------------|----------------------------------|-------------------|-------|------------|----------|--------------|
| [Sm(L) <sub>3</sub> .(H <sub>2</sub> O) <sub>2</sub> ] | 15.53                     | 1.32                 | 3.70                      | $\Omega_2 > \Omega_6 > \Omega_4$ | 1.30              | 94.27 | 43.98      | 35.88    | Present work |
| [Sm(L) <sub>3</sub> .bipy]                             | 17.88                     | 1.96                 | 4.88                      | $\Omega_2 > \Omega_6 > \Omega_4$ | 1.40              | 94.98 | 57.53      | 53.47    | Present work |
| [Sm(L) <sub>3</sub> .dmph]                             | 18.36                     | 3.41                 | 8.82                      | $\Omega_2 > \Omega_6 > \Omega_4$ | 1.53              | 95.36 | 80.84      | 53.68    | Present work |
| [Sm(L) <sub>3</sub> .batho]                            | 22.53                     | 4.54                 | 11.45                     | $\Omega_2 > \Omega_6 > \Omega_4$ | 1.63              | 96.61 | 84.78      | 59.31    | Present work |
| [Sm(L) <sub>3</sub> .neo]                              | 22.58                     | 1.44                 | 7.72                      | $\Omega_2 > \Omega_6 > \Omega_4$ | 1.33              | 98.14 | 88.03      | 55.03    | Present work |

|                                                        |       |      |      |                                  |      |       |       |       |              |
|--------------------------------------------------------|-------|------|------|----------------------------------|------|-------|-------|-------|--------------|
| [Sm(L) <sub>3</sub> .phen]                             | 23.75 | 4.54 | 6.92 | $\Omega_4 > \Omega_6 > \Omega_2$ | 1.50 | 98.45 | 90.09 | 67.27 | Present work |
| [Sm(L) <sub>3</sub> .(H <sub>2</sub> O) <sub>2</sub> ] | 14.26 | 1.14 | 3.02 | $\Omega_2 > \Omega_6 > \Omega_4$ | 0.83 | 92.90 | 25.03 | -     | 1            |
| [Sm(L) <sub>3</sub> .bipy]                             | 19.35 | 0.17 | 1.54 | $\Omega_2 > \Omega_6 > \Omega_4$ | 1.12 | 92.95 | 37.20 | -     | 1            |
| [Sm(L) <sub>3</sub> .dmph]                             | 21.58 | 0.35 | 2.04 | $\Omega_2 > \Omega_6 > \Omega_4$ | 1.04 | 96.50 | 39.54 | -     | 1            |
| [Sm(L) <sub>3</sub> .batho]                            | 22.99 | 0.36 | 2.53 | $\Omega_2 > \Omega_6 > \Omega_4$ | 1.41 | 96.47 | 58.54 | -     | 1            |
| [Sm(L) <sub>3</sub> .neo]                              | 22.78 | 0.50 | 2.52 | $\Omega_2 > \Omega_6 > \Omega_4$ | 1.44 | 96.47 | 59.01 | -     | 1            |
| [Sm(L) <sub>3</sub> .phen]                             | 24.38 | 0.13 | 2.57 | $\Omega_4 > \Omega_6 > \Omega_2$ | 1.74 | 97.84 | 74.35 | -     | 1            |
| [Sm(L) <sub>3</sub> .(H <sub>2</sub> O) <sub>2</sub> ] | 4.44  | 0.55 | 2.28 | $\Omega_2 > \Omega_6 > \Omega_4$ | 1.34 | 24.40 | 16.34 | -     | 2            |
| [Sm(L) <sub>3</sub> .dmph]                             | 7.71  | 0.74 | 2.92 | $\Omega_2 > \Omega_6 > \Omega_4$ | 1.80 | 25.86 | 33.88 | -     | 2            |
| [Sm(L) <sub>3</sub> .batho]                            | 9.59  | 0.15 | 0.98 | $\Omega_2 > \Omega_6 > \Omega_4$ | 1.92 | 25.86 | 32.64 | -     | 2            |
| [Sm(L) <sub>3</sub> .neo]                              | 10.71 | 0.27 | 1.70 | $\Omega_2 > \Omega_6 > \Omega_4$ | 2.12 | 26.79 | 43.03 | -     | 2            |
| [Sm(L) <sub>3</sub> .phen]                             | 8.91  | 2.87 | 6.56 | $\Omega_2 > \Omega_6 > \Omega_4$ | 2.34 | 27.42 | 25.28 | -     | 2            |
| [Sm(L) <sub>3</sub> .bypy]                             | 15.48 | 0.23 | 2.01 | $\Omega_4 > \Omega_6 > \Omega_2$ | 2.96 | 34.87 | 83.28 | -     | 2            |

**Table: S3 Frontier Molecular Orbitals of C1-C5 complexes with their respective value.**

| Complexes | C1                                                                                  | C2                                                                                  | C3                                                                                  | C4                                                                                   | C5                                                                                    |
|-----------|-------------------------------------------------------------------------------------|-------------------------------------------------------------------------------------|-------------------------------------------------------------------------------------|--------------------------------------------------------------------------------------|---------------------------------------------------------------------------------------|
|           | 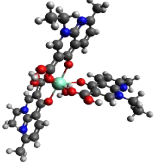 |  |  |  |  |

|                |                                                                                     |                                                                                     |                                                                                     |                                                                                       |                                                                                       |
|----------------|-------------------------------------------------------------------------------------|-------------------------------------------------------------------------------------|-------------------------------------------------------------------------------------|---------------------------------------------------------------------------------------|---------------------------------------------------------------------------------------|
| <b>LUMO +1</b> | 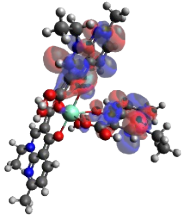   |    |    |    |    |
| <b>Energy</b>  | 2.59 eV                                                                             | 2.53 eV                                                                             | 2.79 eV                                                                             | 1.97 eV                                                                               | 2.98 eV                                                                               |
| <b>LUMO</b>    |    |    |    |    |    |
| <b>Energy</b>  | 2.23 eV                                                                             | 2.02 eV                                                                             | 2.19 eV                                                                             | 1.43 eV                                                                               | 2.18 eV                                                                               |
| <b>HOMO</b>    |   |   |   |   |   |
| <b>Energy</b>  | -1.16 eV                                                                            | -1.24 eV                                                                            | -1.13 eV                                                                            | -1.71 eV                                                                              | -1.07 eV                                                                              |
| <b>HOMO -1</b> |  |  |  |  |  |
| <b>Energy</b>  | -5.27 eV                                                                            | -4.98 eV                                                                            | -5.03 eV                                                                            | -5.60 eV                                                                              | -5.04 eV                                                                              |

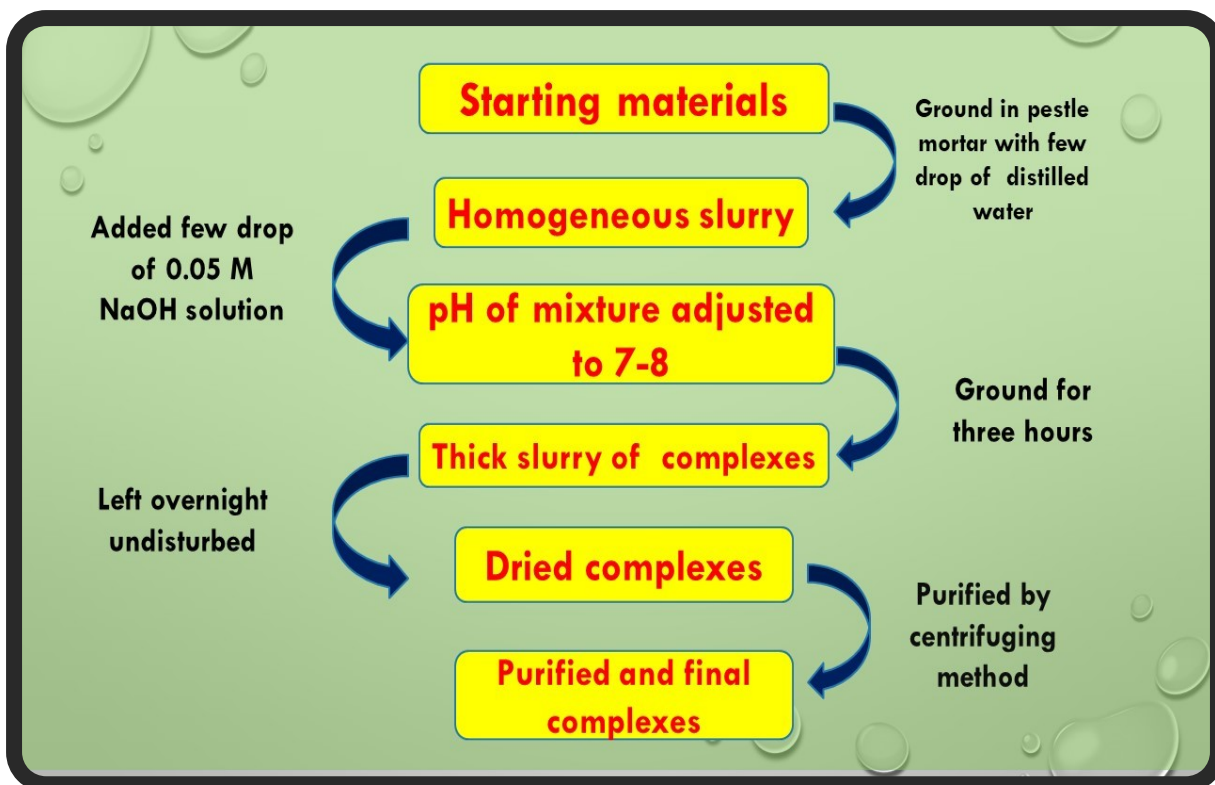

**Fig. S1** Flowchart representing the steps of synthesis complexes by liquid assisted grinding method.

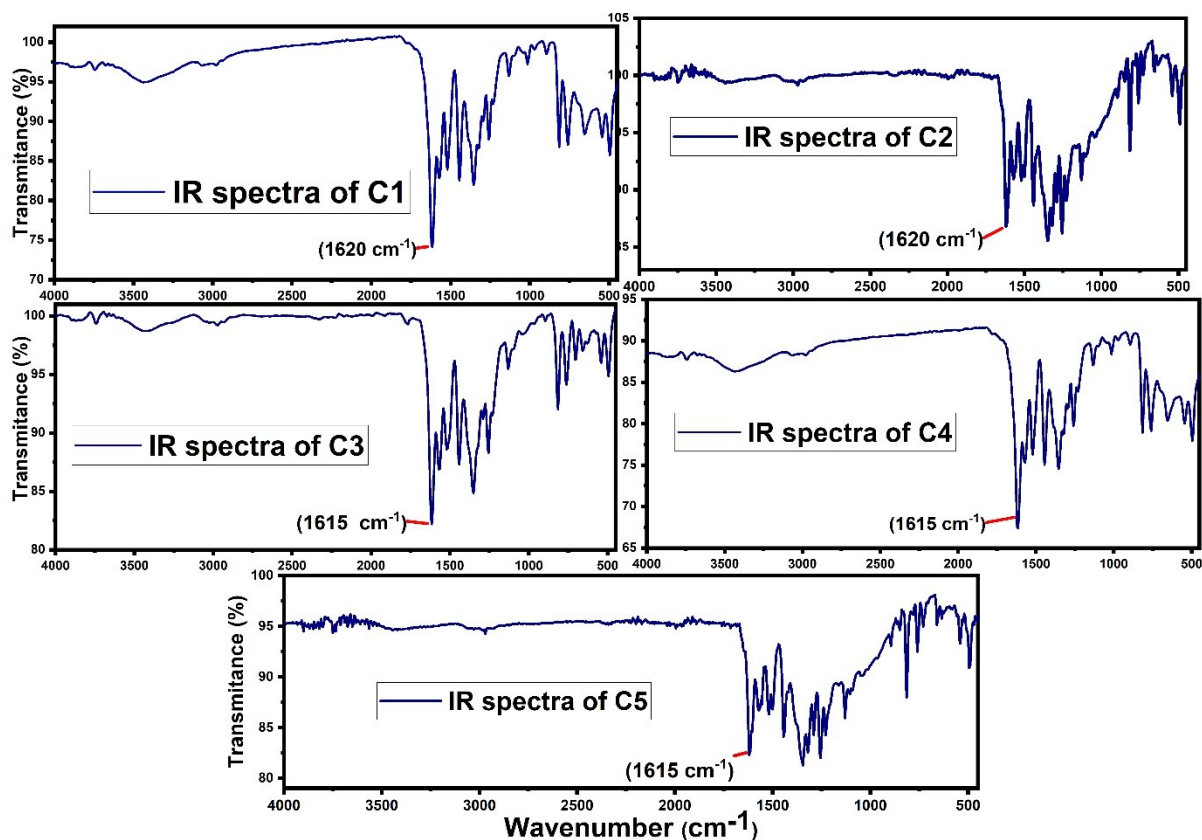

Fig. S2 FT-IR spectra of C1-C5 complexes in solid state.

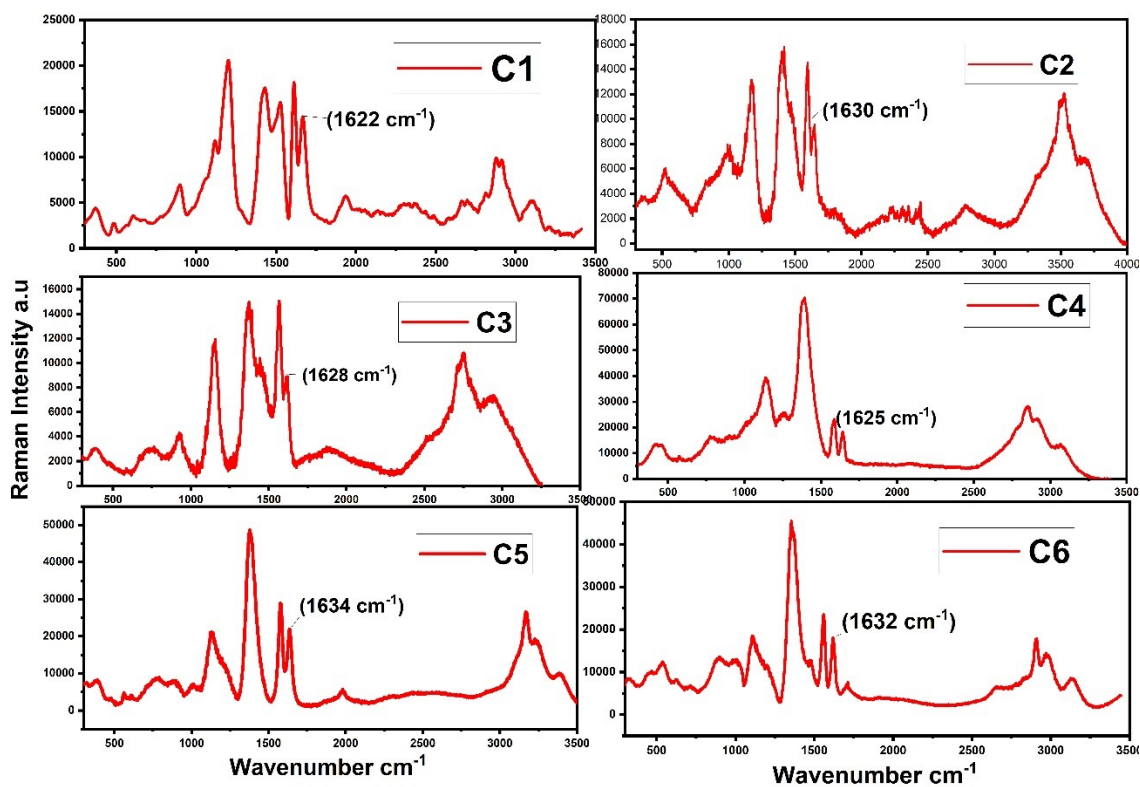

Fig. S3 Raman spectra of all complexes C1-C6 .

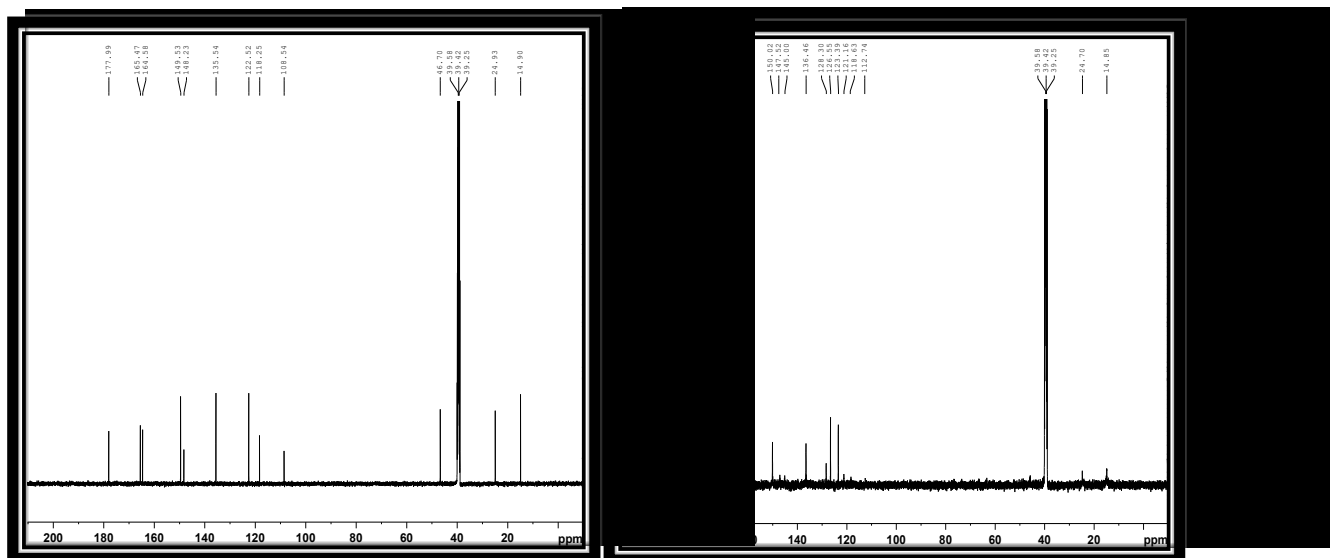

(a)

(b)

Fig. S4(a)  $^{13}\text{C}$ -NMR spectra of ligand and (b)  $^{13}\text{C}$ -NMR spectra of C6 complex

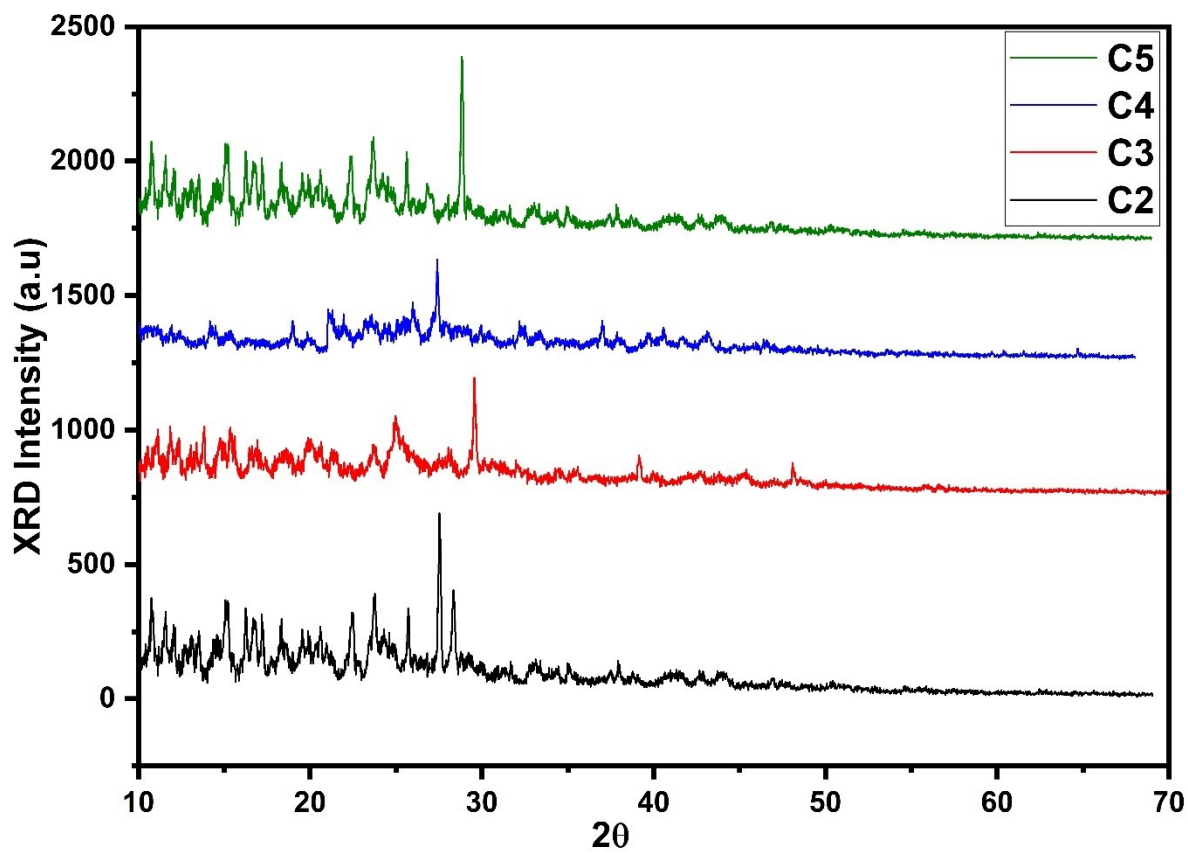

Fig. S5 PXRD pattern of C2-C5 complexes.

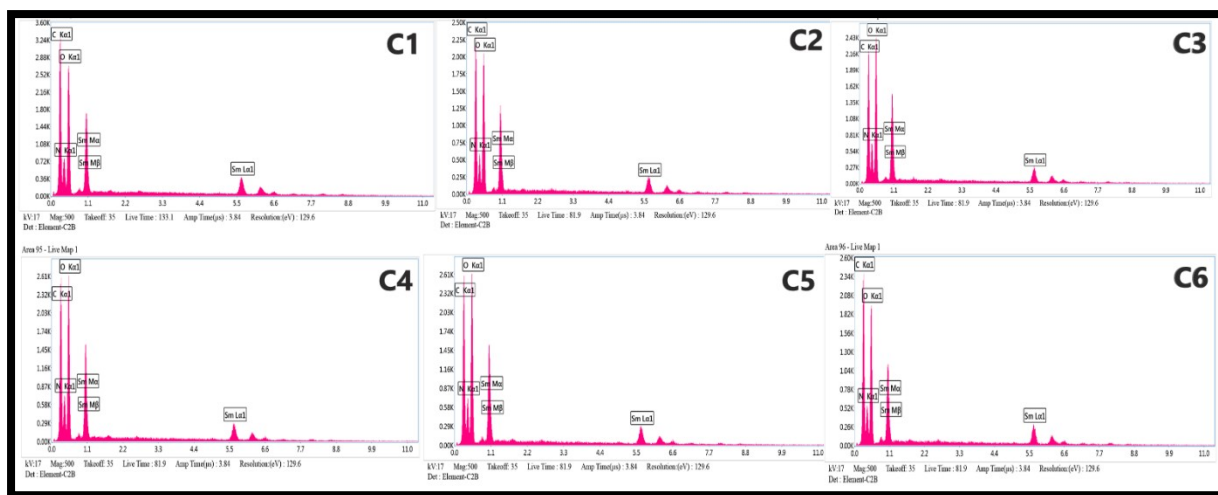

Fig. S6(a) EDAX spectra exhibiting compositional element of all complexes C1-C6.

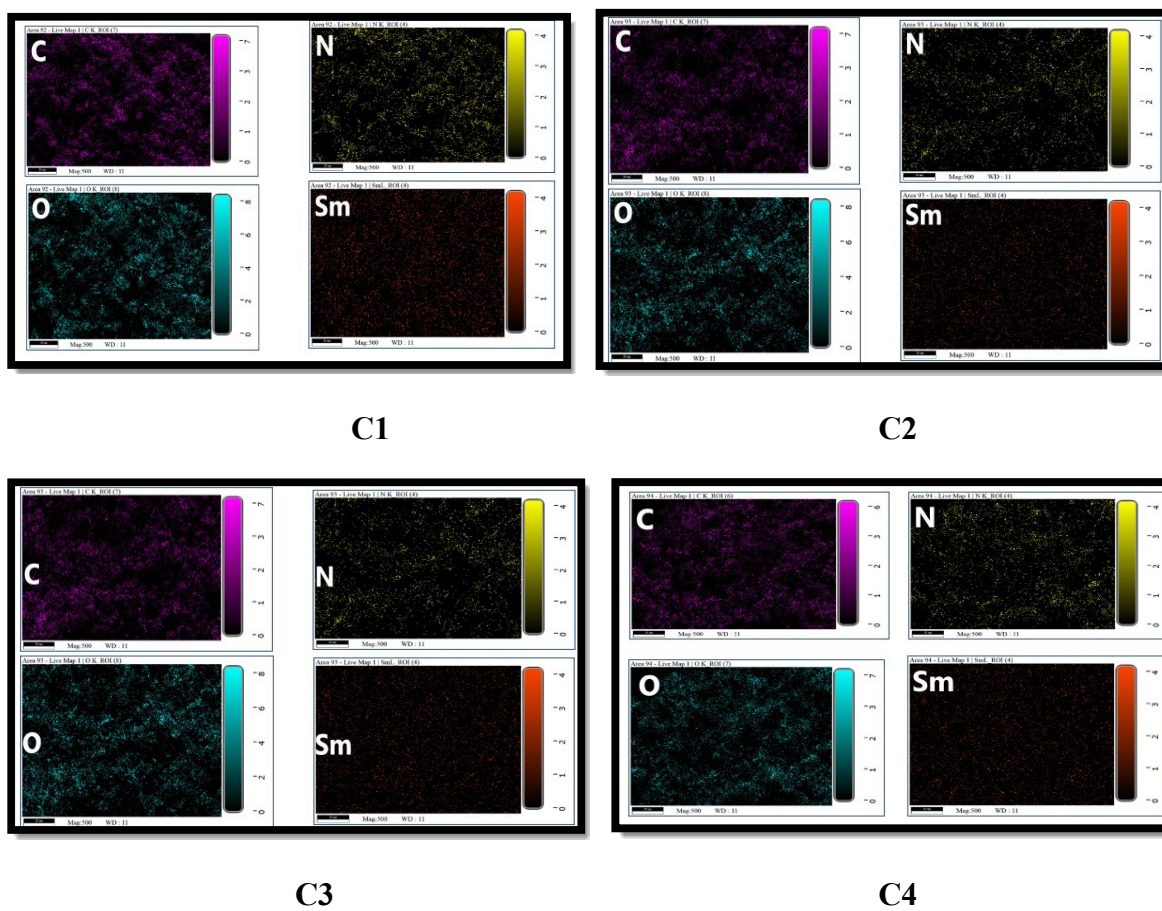



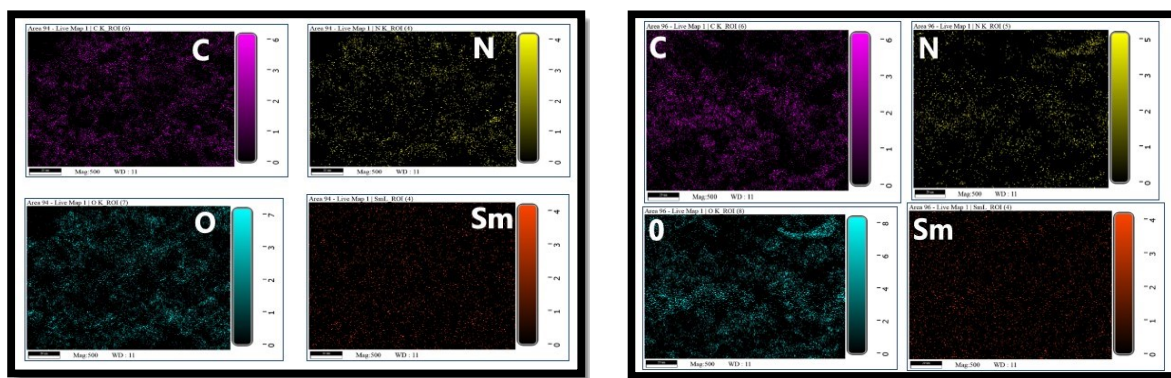

C5

C6

Fig. S6(b) EDAX mapping of all C1-C6 complexes.

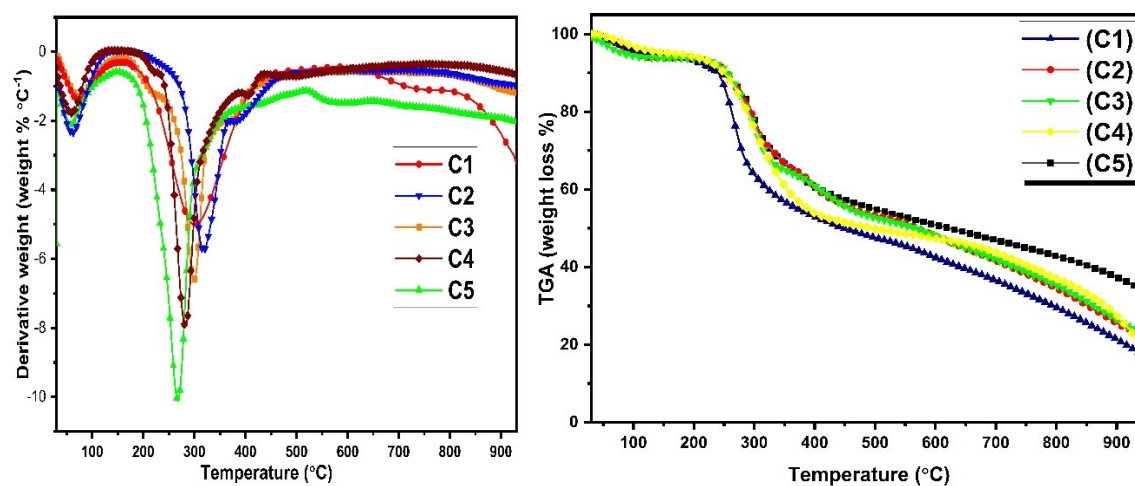

Fig. S7 TGA/DTG thermograph of C1-C5 complexes

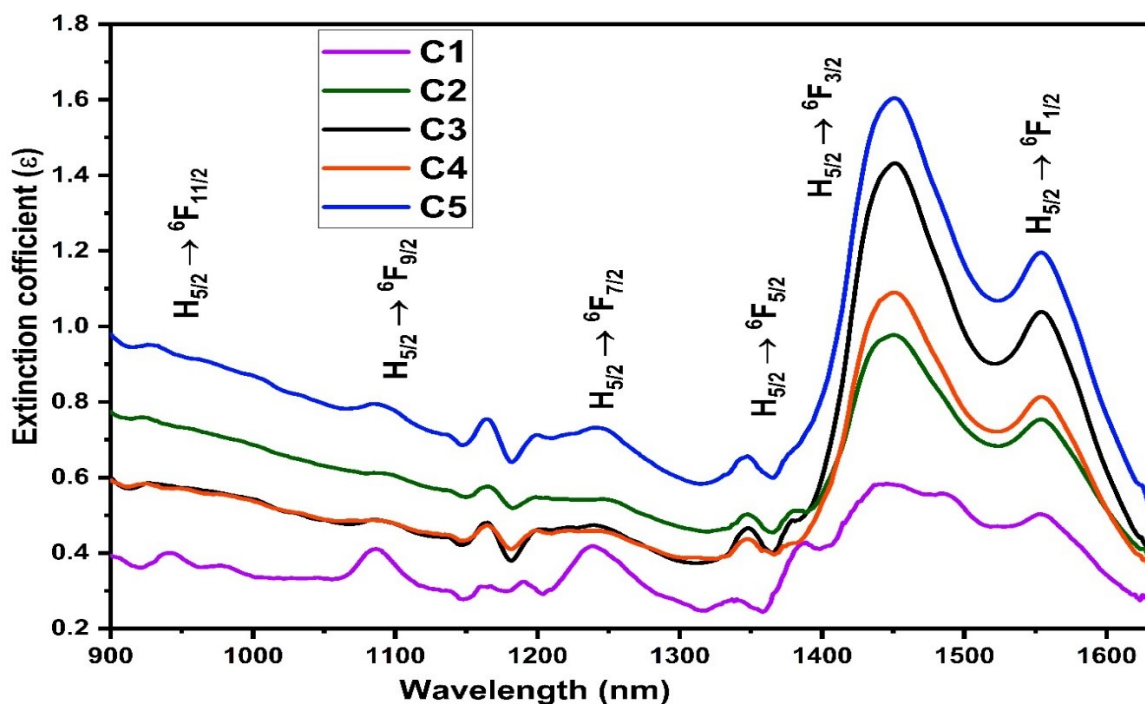

Fig. S8 NIR absorption spectra of C1, C2, C3-C6 complexes representing various transitions.

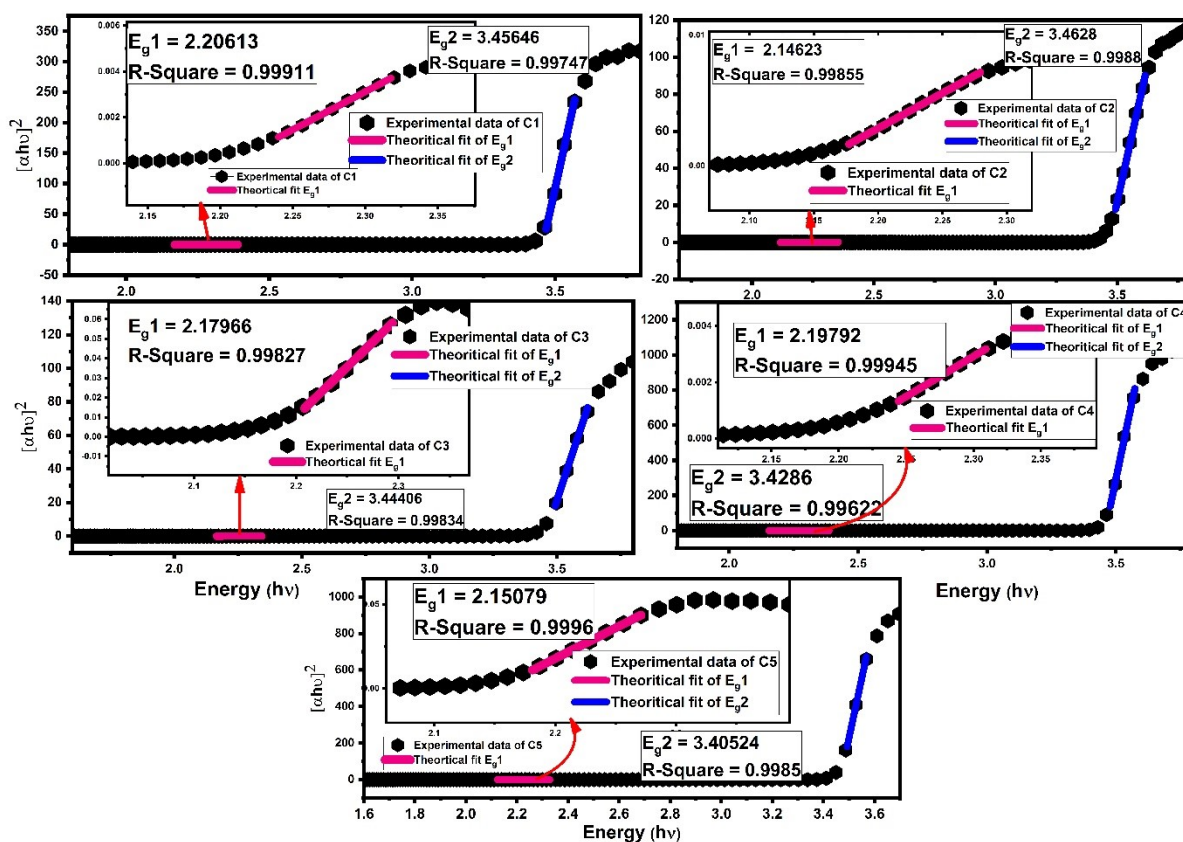

Fig. S9 Linear fitted curve of complexes (C1- C5) using tauc's relation to obtained band gap values ( $E_{g2}$ ) in higher energy region whereas in inset of picture shows the zoomed lower energy region with another band gap ( $E_{g1}$ ).

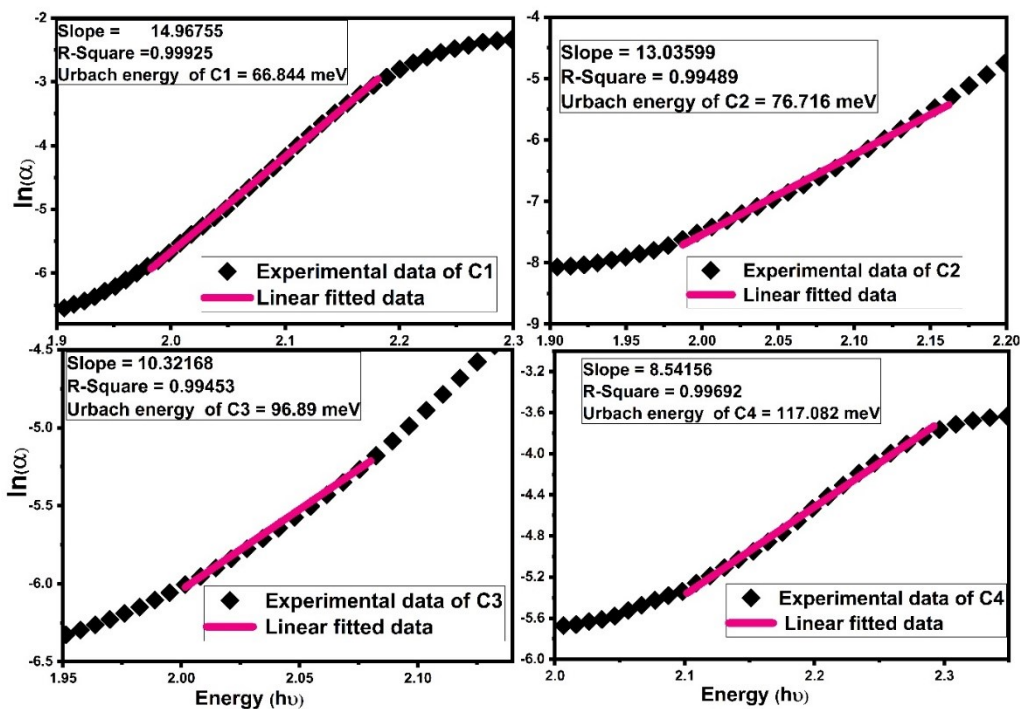

Fig. S10 Fitting of absorption coefficient of C1-C4 complexes using linear fit to obtained Urbach band tail width ( $U_e$ )

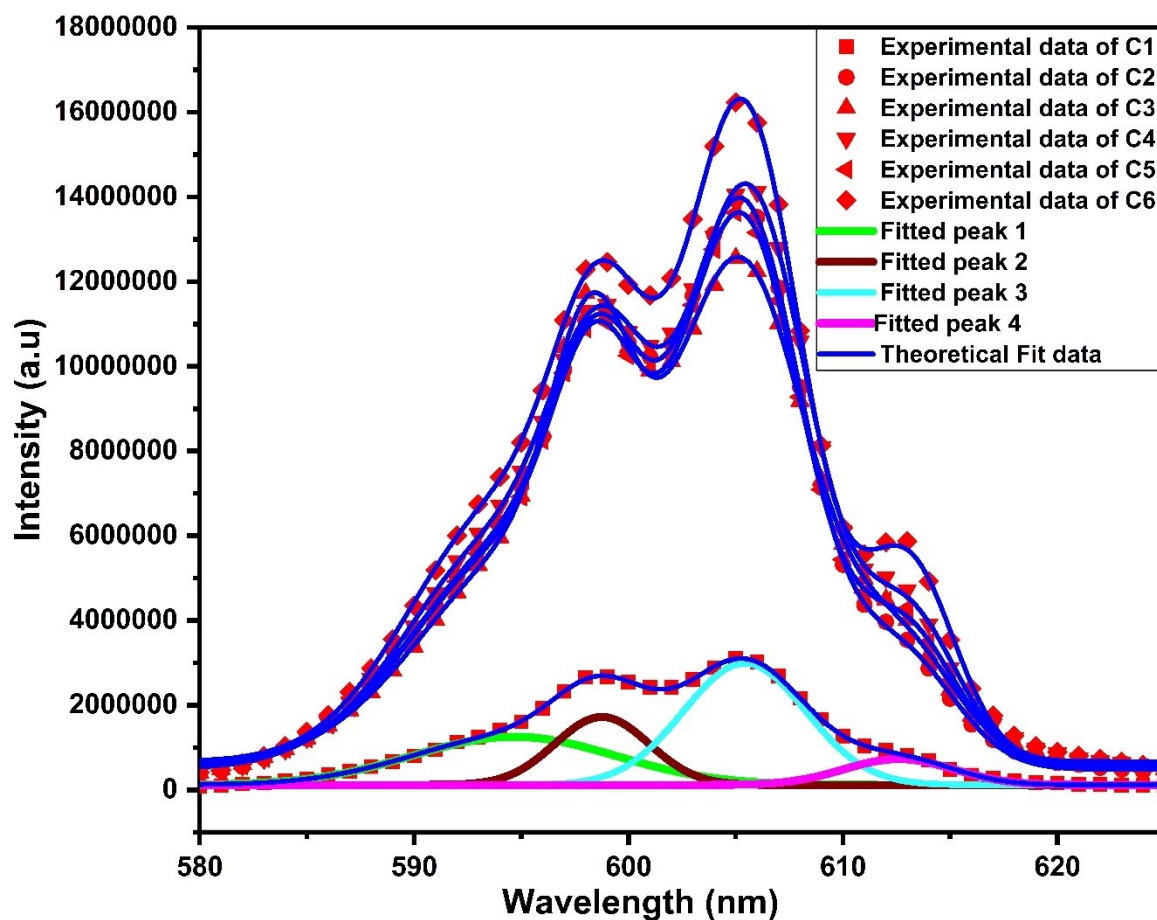

**Fig. S11 Deconvolution into four peaks of  ${}^4G_{5/2} \rightarrow {}^6H_{7/2}$  transition by Gaussian Fitting method to show more Starke splitting in solution phase as compared to solid phase emission respectively.**

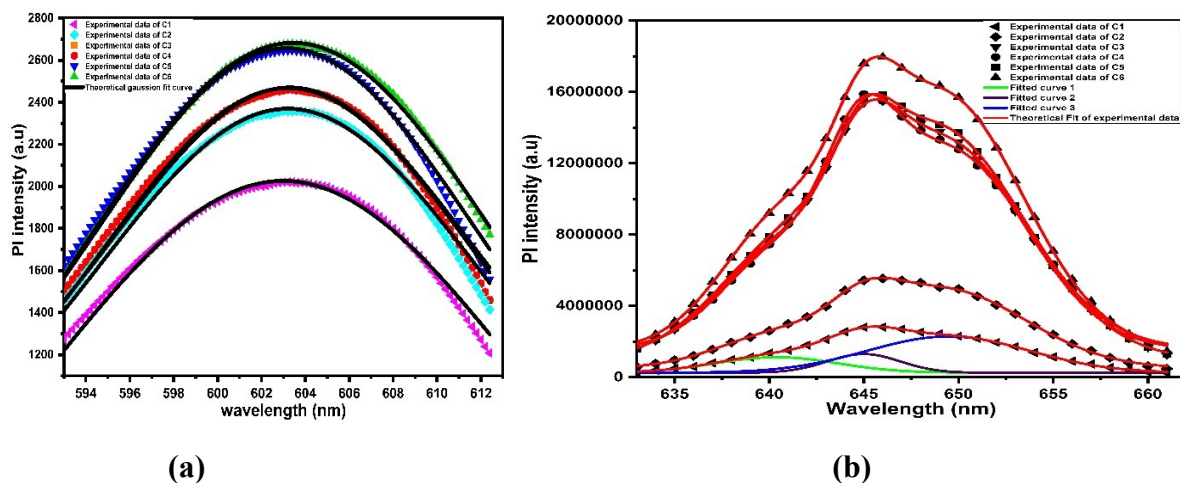

**Fig. S12 (a) & S12 (b) To find out FWHM, Gaussian Fitting of  ${}^4G_{5/2} \rightarrow {}^6H_{7/2}$  and  ${}^4G_{5/2} \rightarrow {}^6H_{9/2}$  transitions of solid and solution phase solid phase emission respectively.**

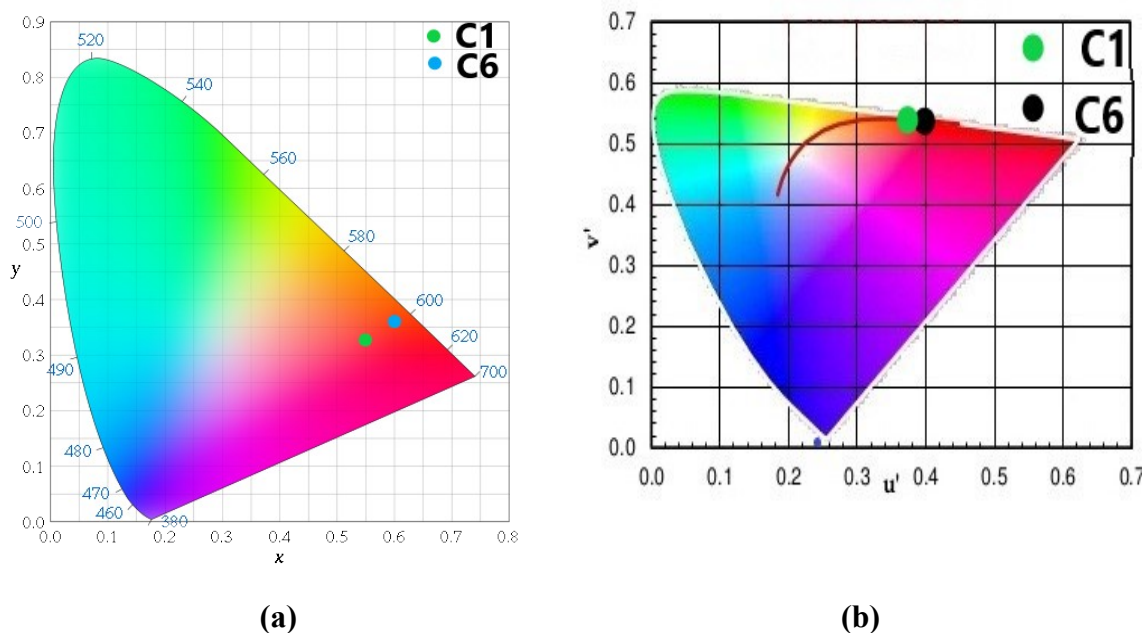

**Fig. S13 (a) CIE chromaticity coordinates of complexes C1 and C6 demarcated in radish orange region of colour gamut space. (b)  $u'$  and  $v'$  coordinates of complexes C1 and C6 in solid state on CCT chart showing their emission in warm radish orange light.**

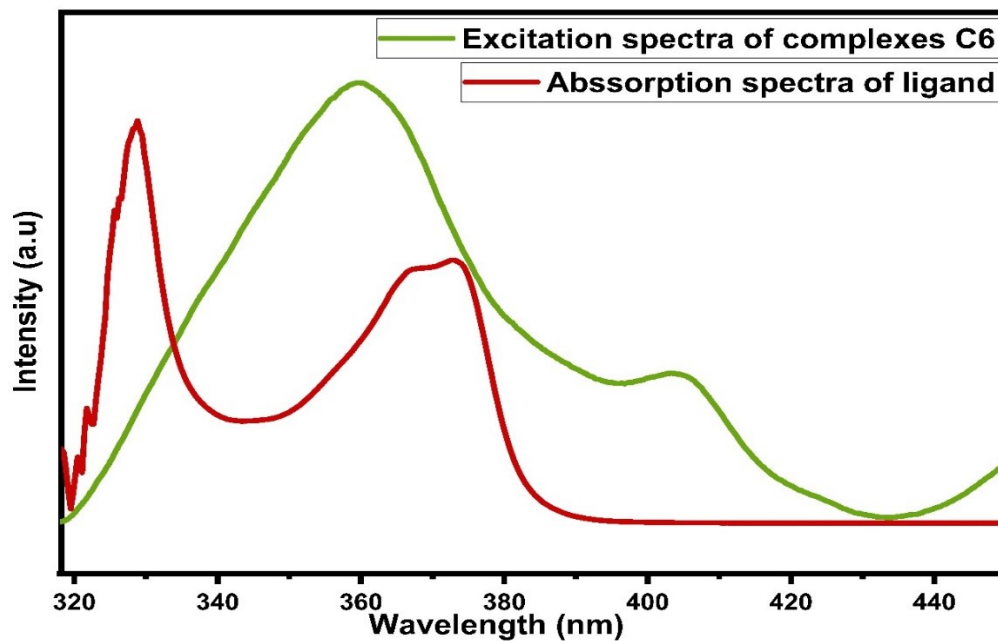

Fig. S14. Overlapping spectra of absorption spectra of L and emission spectra of C1 complex.

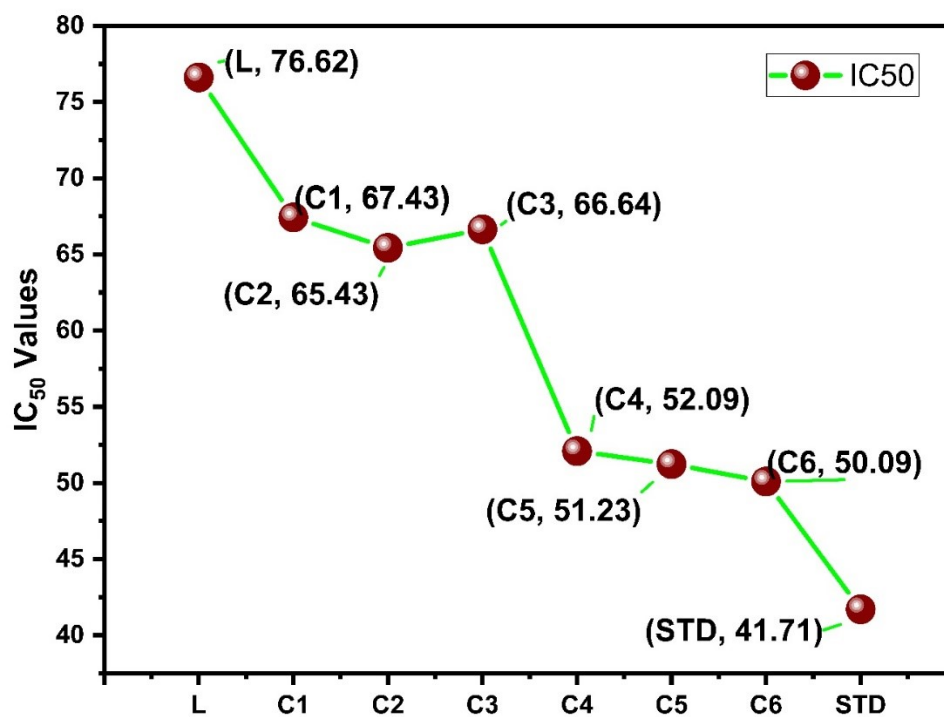

Fig. S15. IC<sub>50</sub> values of complexes C1-C6 relative to standard drugs.

## References:

- 1 P. Kumari, S. Khatri, M. Kumar, P. Ahlawat, S. P. Khatkar, V. B. Taxak and R. Kumar, *Polyhedron*, 2022, 115847.
- 2 P. Ahlawat, S. Bhayana, V. Lather, S. Khatri, P. Kumari, M. Kumar, M. S. Shekhawat, V. B. Taxak, S. P. Khatkar and R. Kumar, *Opt. Mater. (Amst.)*, 2022, **133**, 112940.
